# Supplementary material for: Long-term mental health outcomes after SARS-CoV-2 infection: prospective cohort study
Source: bioRxiv or medRxiv preprint supplement (doi:10.1101/2022.09.26.22280293), 2022-09-27
Supplement: Supplementary file [file media-1.pdf]

## Long-term mental health outcomes after SARS-CoV-2 infection: prospective cohort study

| <b>Table of Contents</b>                                                                                                                                                                                 | <b>Page</b> |
|----------------------------------------------------------------------------------------------------------------------------------------------------------------------------------------------------------|-------------|
| <b>SUPPLEMENTARY FIGURES</b>                                                                                                                                                                             |             |
| Supplementary Figure 1. Distribution of SARS-CoV-2 infections in the UK Biobank over the study period                                                                                                    | <b>1</b>    |
| Supplementary Figure 2. Risks of first or recurrent psychiatric diagnoses and prescriptions for psychotropic medications after SARS-Cov-2 infection compared with the contemporary control group         | <b>2</b>    |
| Supplementary Figure 3. Risks of first psychiatric diagnoses and prescriptions for psychotropic medications after SARS-CoV-2 infection compared with the historical control group                        | <b>3</b>    |
| Supplementary Figure 4. Risks of first or recurrent psychiatric diagnoses and prescriptions for psychotropic medications after SARS-CoV-2 infection compared with the historical control group           | <b>4</b>    |
| Supplementary Figure 5. Risks of composite mental health outcomes after SARS-CoV-2 infection compared with the historical control group                                                                  | <b>5</b>    |
| <b>SUPPLEMENTARY TABLES</b>                                                                                                                                                                              |             |
| Supplementary Table 1. Definition of mental health related outcomes                                                                                                                                      | <b>6</b>    |
| Supplementary Table 2. Demographic and medical characteristics of SARS-CoV-2 infection, contemporary control, and historical control cohorts before weighting                                            | <b>8</b>    |
| Supplementary Table 3. Risks of first composite mental health outcomes in participants with breakthrough infection compared with non-breakthrough infection                                              | <b>10</b>   |
| Supplementary Table 4. Risks of first composite mental health outcomes in participants who tested positive in hospital setting compared with those who tested positive in community setting              | <b>11</b>   |
| Supplementary Table 5. Risks of first composite mental health outcomes in SARS-CoV-2 infection group compared with the control groups of respiratory tract infection or the test-negative control groups | <b>12</b>   |
| Supplementary Table 6. Sensitivity analyses for the risks of first composite mental health outcomes in infection group compared with contemporary control groups                                         | <b>13</b>   |

**Supplementary Figure 1. Distribution of SARS-CoV-2 infections in the UK Biobank over the study period**

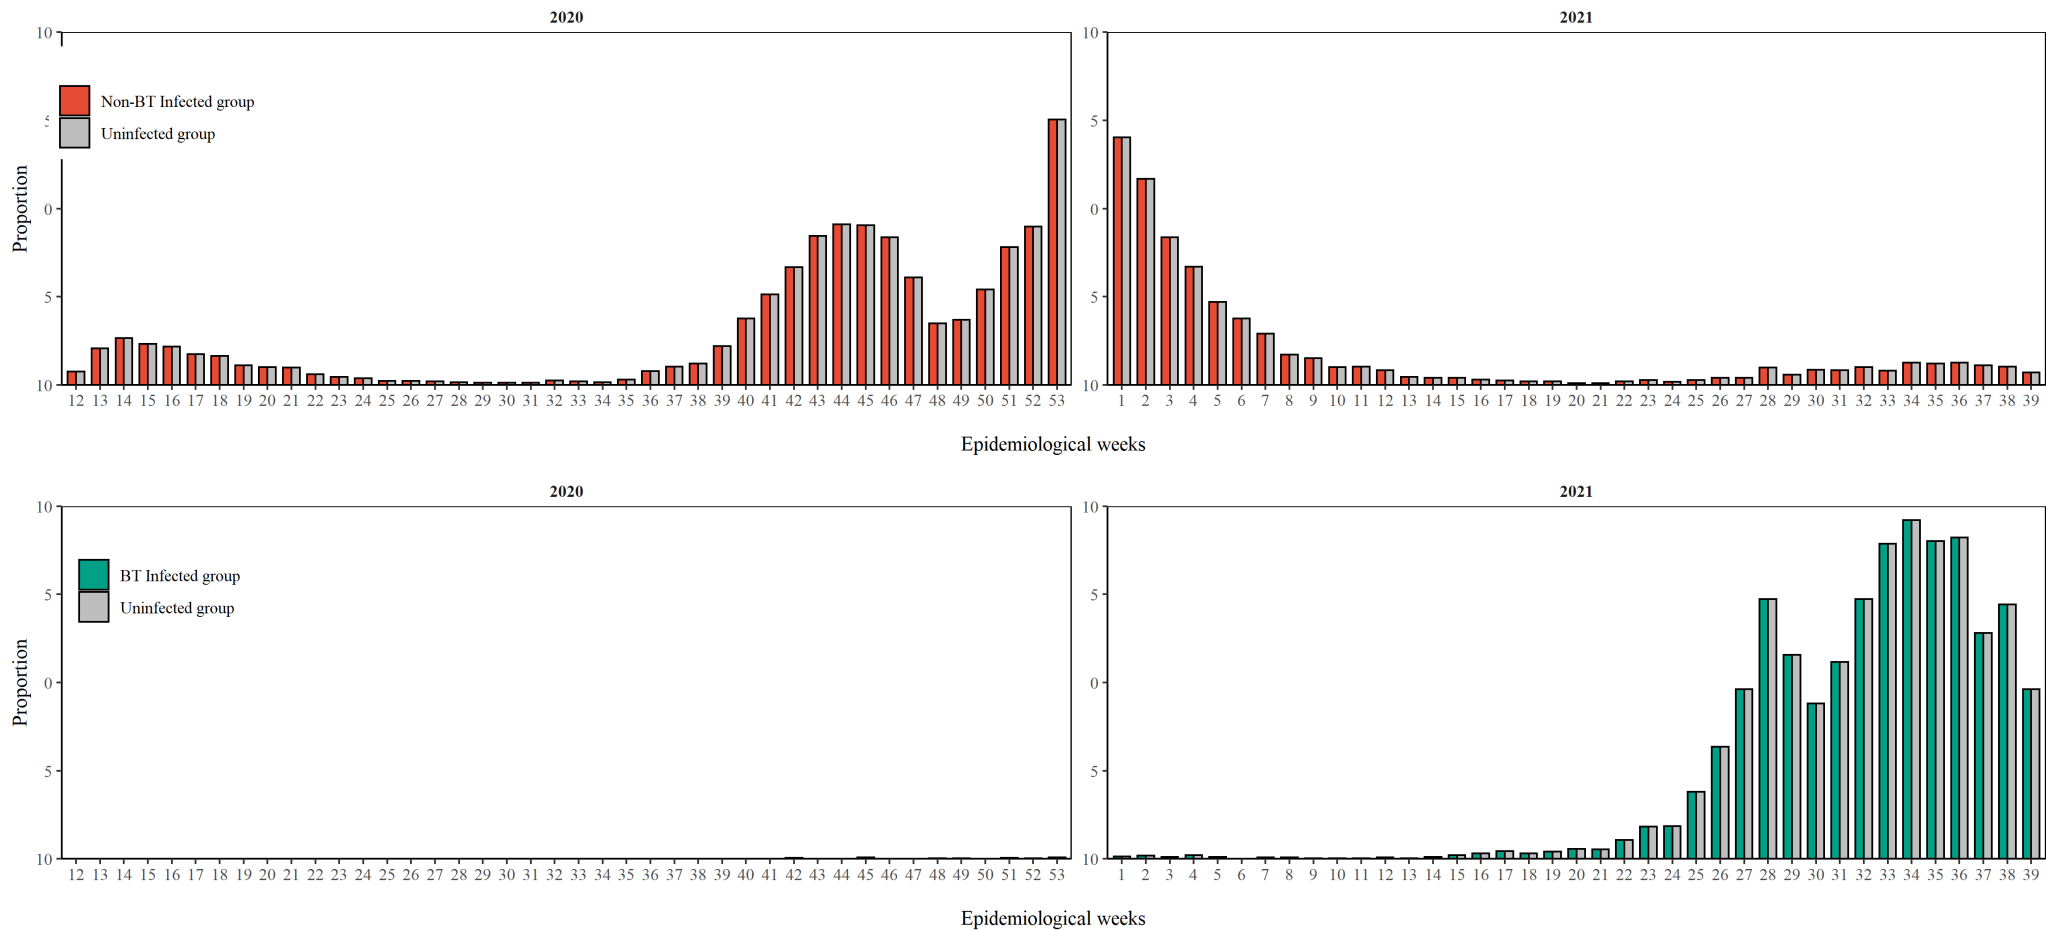

**Figure S2. Risks of first or recurrent psychiatric diagnoses and prescriptions for psychotropic medications after SARS-CoV-2 infection compared with the contemporary control group**

**A**

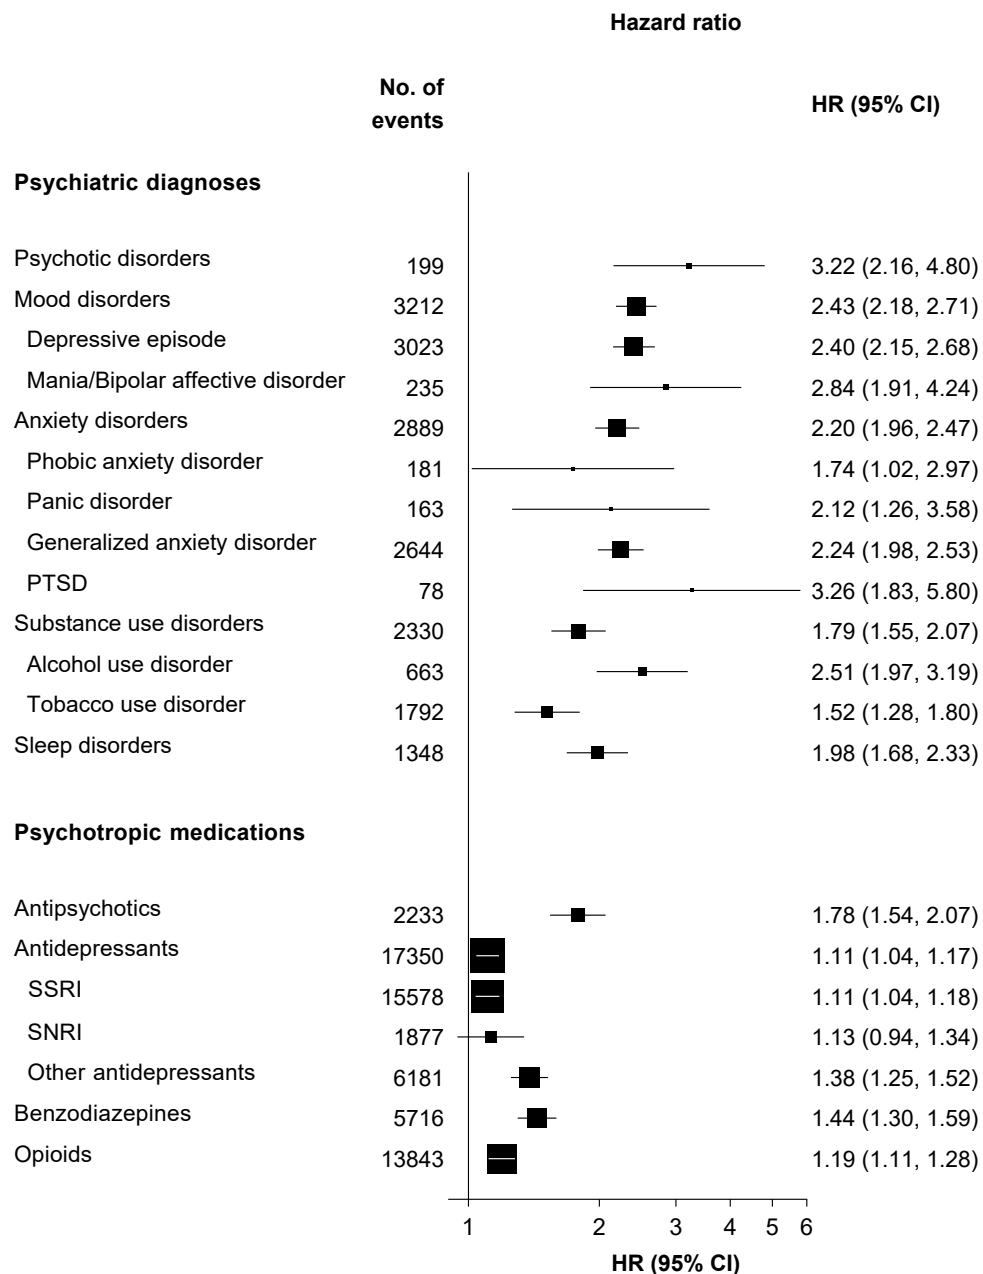

**B**

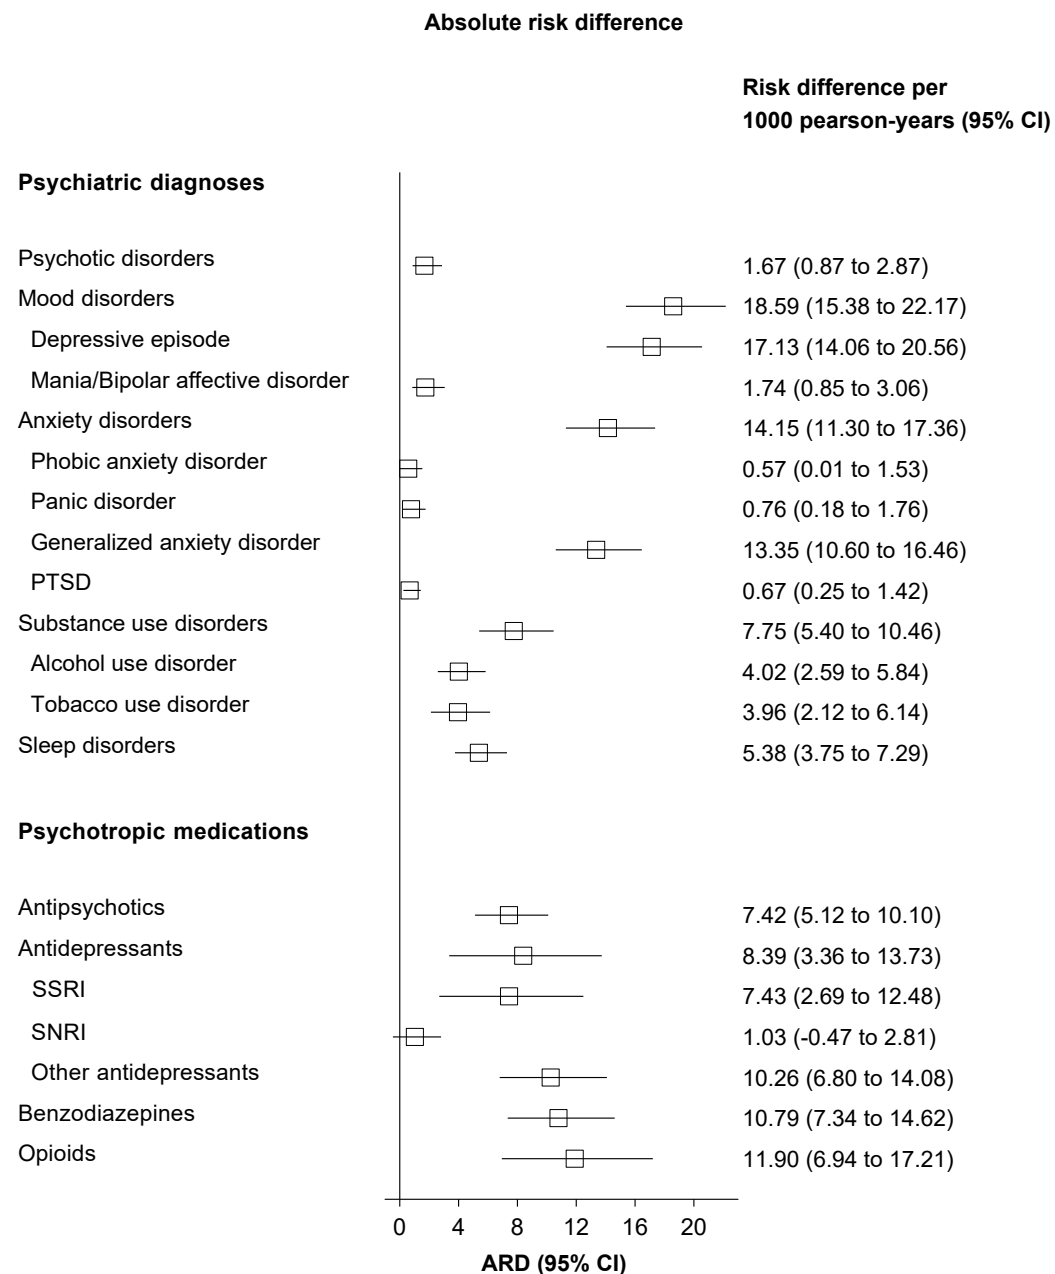

Mental health outcomes were ascertained after the SARS-CoV-2 infection until the end of follow-up. Hazard ratios were adjusted for predefined and data-driven covariates. SSRI=selective serotonin reuptake inhibitor; SNRI =serotonin-noradrenaline reuptake inhibitor.

**Figure S3. Risks of first psychiatric diagnoses and prescriptions for psychotropic medications after SARS-CoV-2 infection compared with the historical control group**

**A**

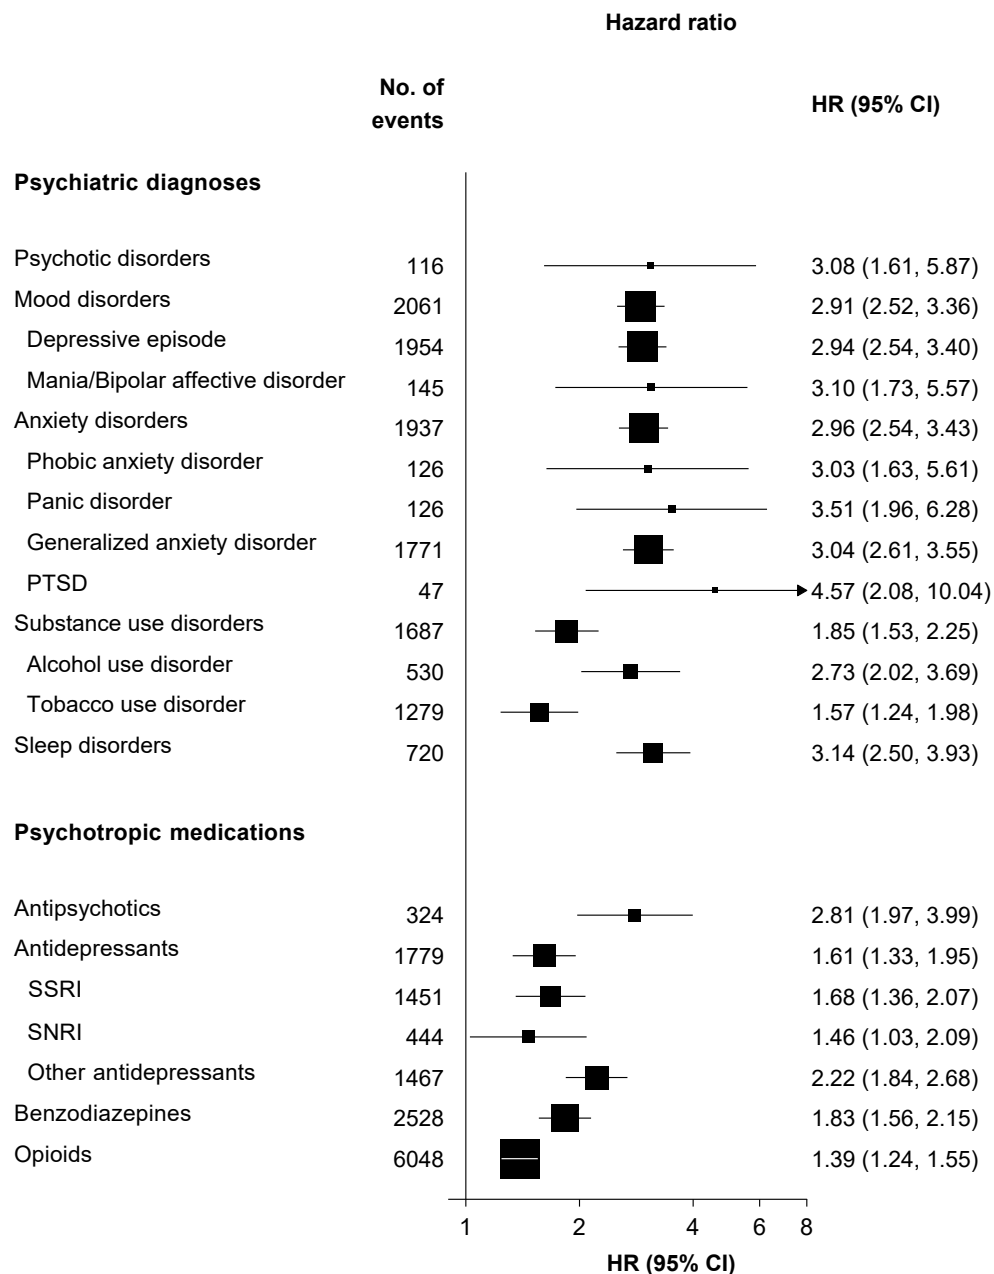

**B**

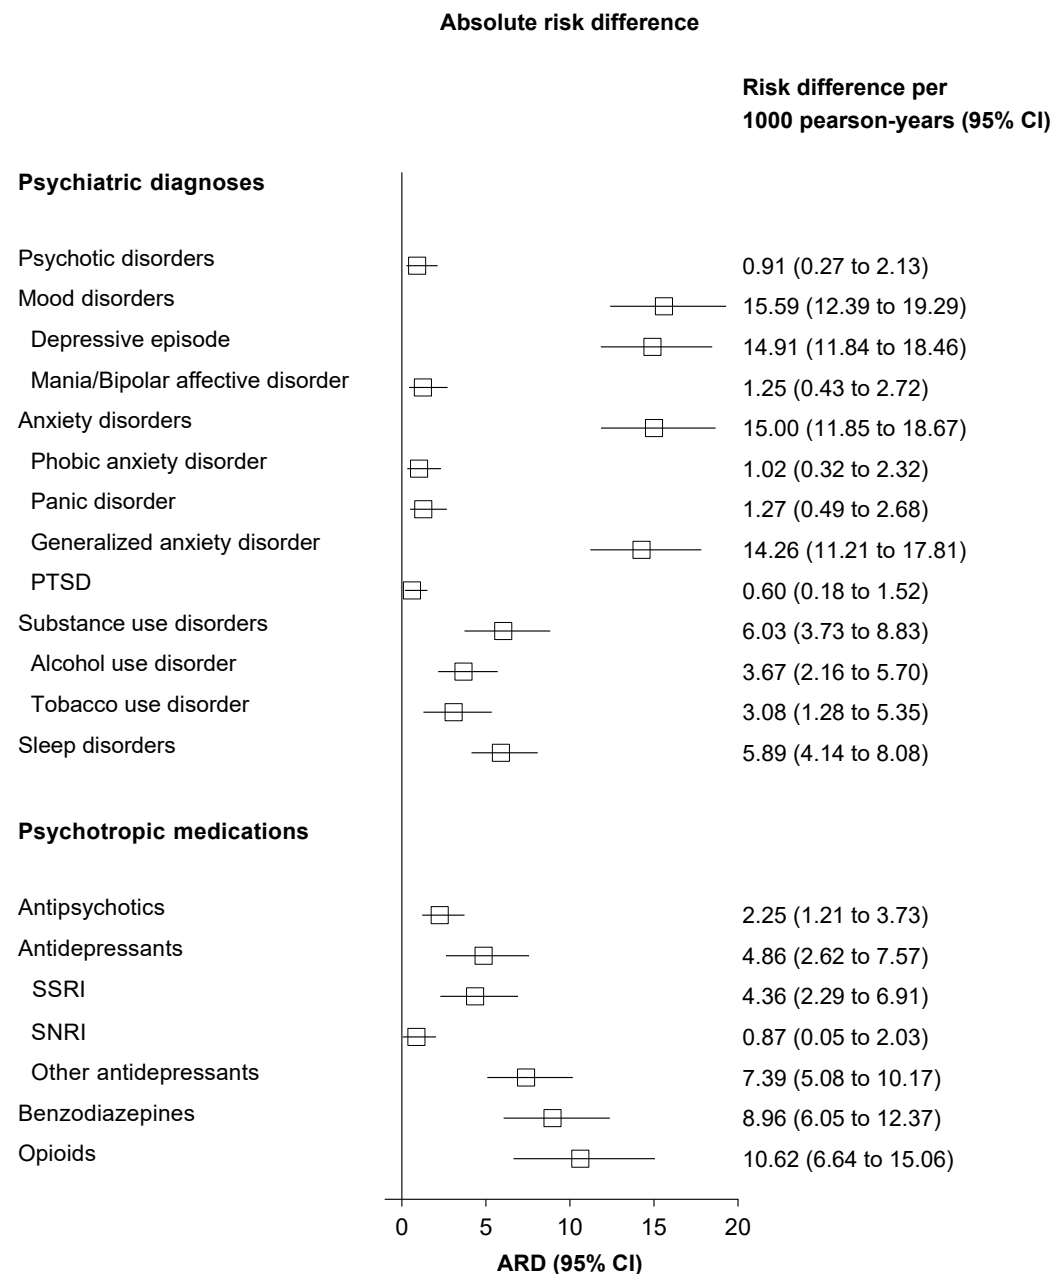

Mental health outcomes were ascertained after the SARS-CoV-2 infection until the end of follow-up. Hazard ratios were adjusted for predefined and data-driven covariates. SSRI=selective serotonin reuptake inhibitor; SNRI =serotonin-noradrenaline reuptake inhibitor.

**Figure S4. Risks of first or recurrent psychiatric diagnoses and prescriptions for psychotropic medications after SARS-CoV-2 infection compared with the historical control group**

**A**

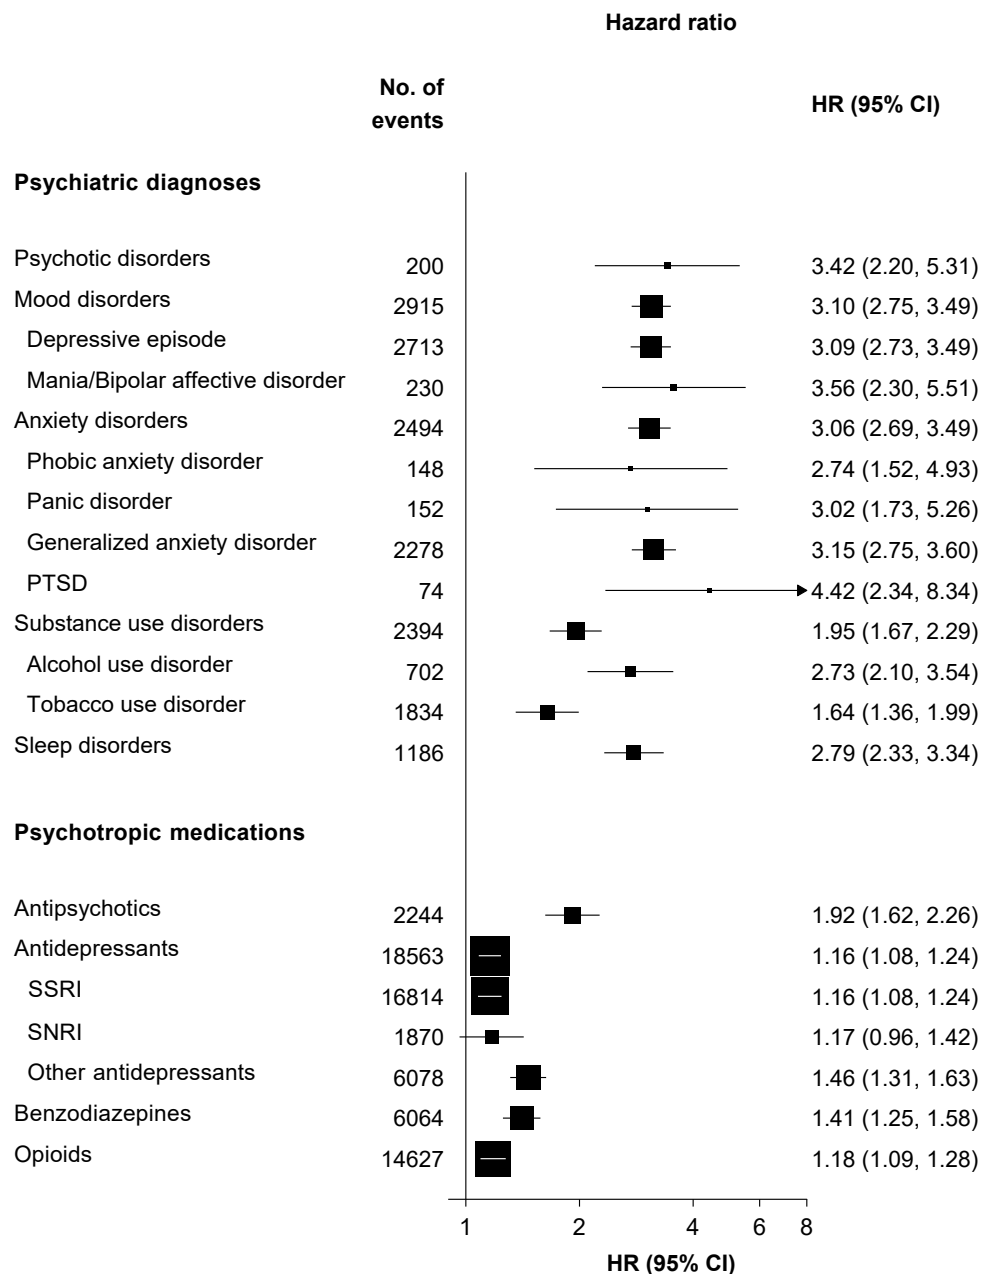

**B**

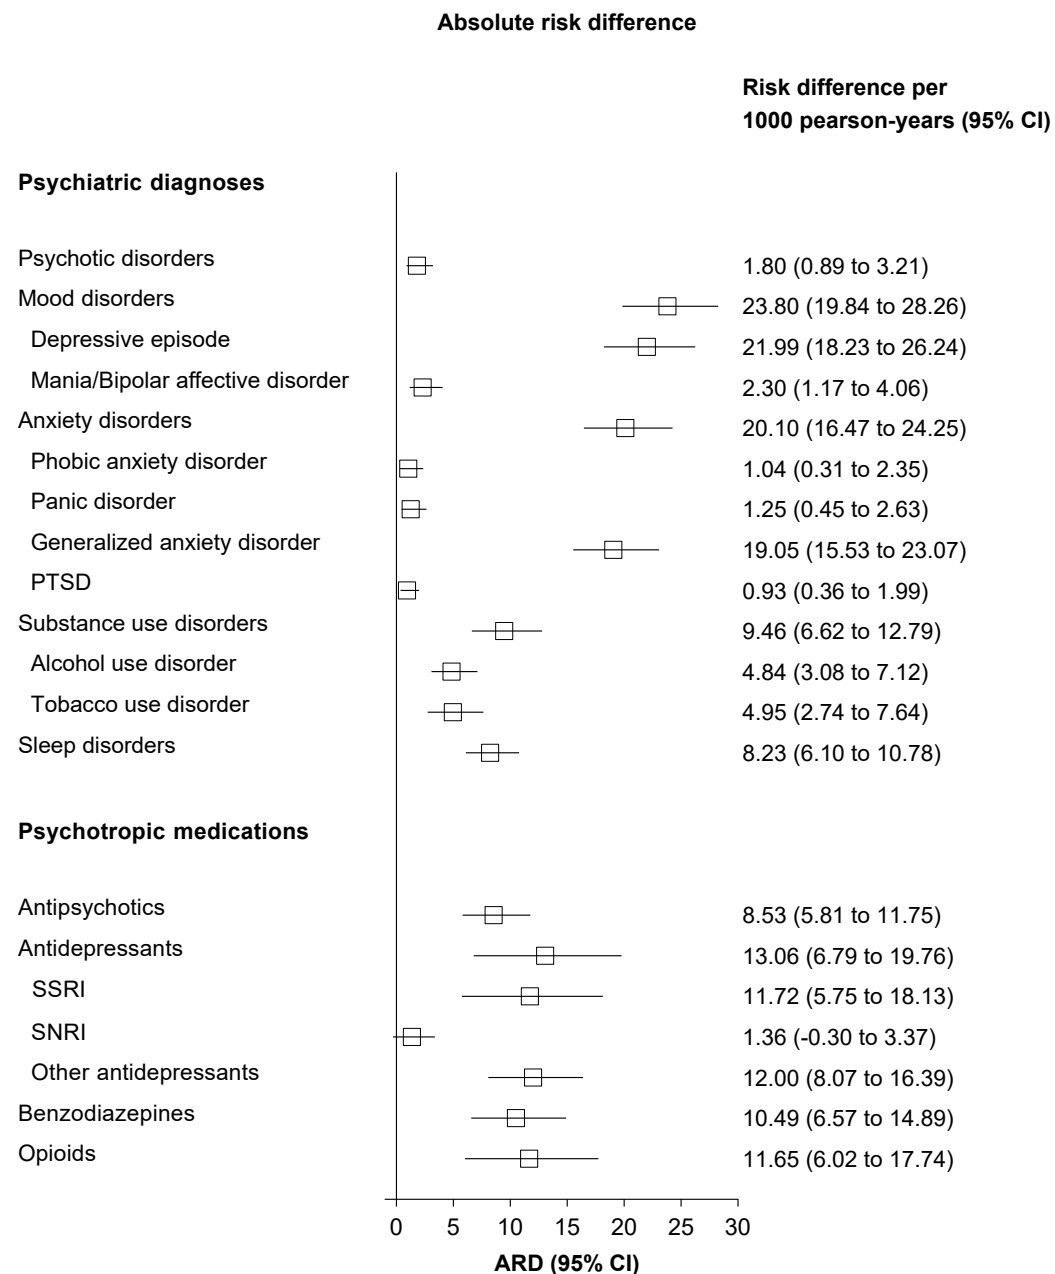

Mental health outcomes were ascertained after the SARS-CoV-2 infection until the end of follow-up. Hazard ratios were adjusted for predefined and data-driven covariates. SSRI=selective serotonin reuptake inhibitor; SNRI =serotonin-noradrenaline reuptake inhibitor.

**Figure S5. Risks of composite mental health outcomes after SARS-CoV-2 infection compared with the historical control group**

**A**

**Hazard ratio**

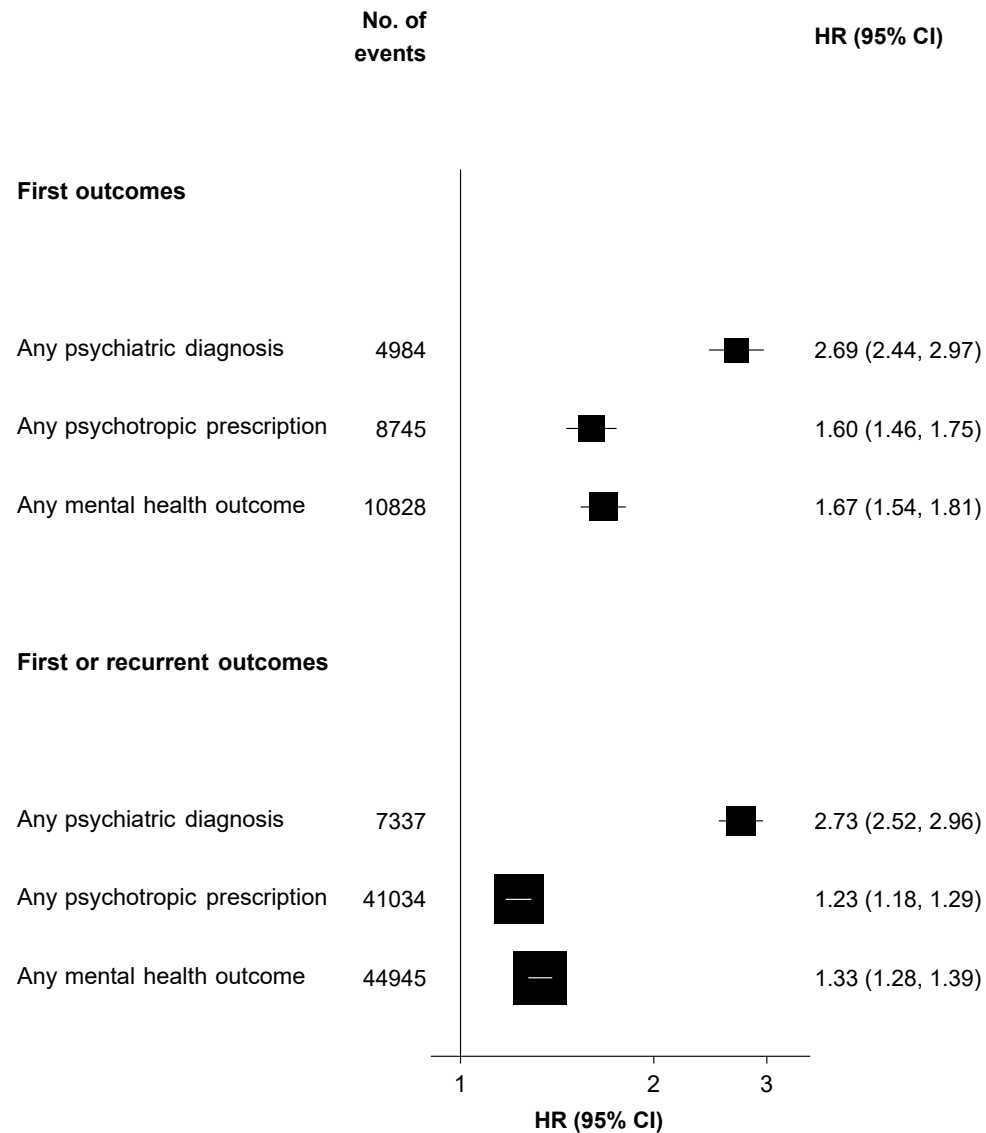

**B**

**Absolute risk difference**

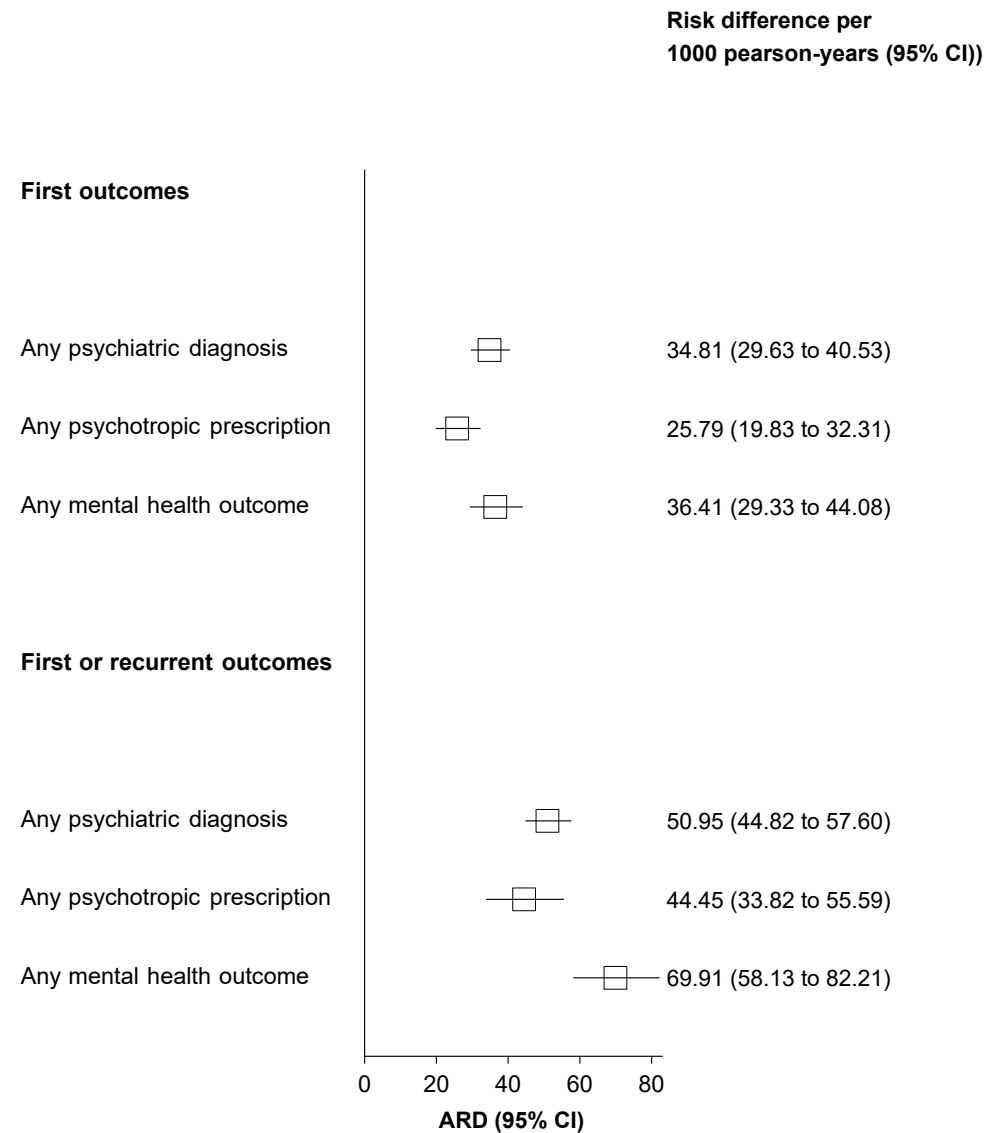

Mental health outcomes were ascertained after the SARS-CoV-2 infection until the end of follow-up. Hazard ratios were adjusted for predefined and data-driven covariates.

**Supplementary Table 1. Definition of mental health related outcomes**

| <b>Outcome</b>                                    | <b>Type of definition</b> | <b>Definition</b>                                                                                                                                            |
|---------------------------------------------------|---------------------------|--------------------------------------------------------------------------------------------------------------------------------------------------------------|
| <b>Psychiatric diagnoses</b>                      |                           |                                                                                                                                                              |
| Psychotic disorders                               | ICD-10                    | F20-F29                                                                                                                                                      |
| Mood disorders                                    | ICD-10                    | F30-F39                                                                                                                                                      |
| Mania/Bipolar affective disorder                  | ICD-10                    | F30-F31                                                                                                                                                      |
| Depressive episode                                | ICD-10                    | F32                                                                                                                                                          |
| Anxiety disorders                                 | ICD-10                    | F40-F48                                                                                                                                                      |
| Phobic anxiety disorders                          | ICD-10                    | F40                                                                                                                                                          |
| Panic disorder                                    | ICD-10                    | F41.0                                                                                                                                                        |
| Generalized anxiety disorder                      | ICD-10                    | F41.1                                                                                                                                                        |
| Posttraumatic stress disorder                     | ICD-10                    | F43.1                                                                                                                                                        |
| Substance use disorders                           | ICD-10                    | F10-F19                                                                                                                                                      |
| Illicit drug use disorder                         | ICD-10                    | F12, F14-F16, F18-F19                                                                                                                                        |
| Alcohol use disorder                              | ICD-10                    | F10                                                                                                                                                          |
| Tobacco use disorder                              | ICD-10                    | F17                                                                                                                                                          |
| Sedative/hypnotics use disorder                   | ICD-10                    | F13                                                                                                                                                          |
| Sleep disorders                                   | ICD-10                    | F51, G47                                                                                                                                                     |
| <b>Prescriptions for psychotropic medications</b> |                           |                                                                                                                                                              |
| Antipsychotics                                    | Medication                | Amisulpride, Aripiprazole, Clozapine, Olanzapine, Paliperidone, Quetiapine, Risperidone                                                                      |
| Antidepressant                                    | Medication                | Any SSRI, SNRI, or other antidepressant medications                                                                                                          |
| SSRI                                              | Medication                | Citalopram, Escitalopram, Dapoxetine, Escitalopram, Fluoxetine, Fluvoxamine, Paroxetine, Sertraline, Vortioxetine, Trazodone                                 |
| SNRI                                              | Medication                | Venlafaxine, Duloxetine, Milnacipran                                                                                                                         |
| Other antidepressant drugs                        | Medication                | Flupentixol, Doxepin, Bupropion, Amoxapine, Maprotiline, Mianserin, Mirtazapine                                                                              |
| Benzodiazepines                                   | Medication                | Diazepam, Nitrazepam, Lorazepam, Flurazepam, Temazepam, Flunitrazepam, Alprazolam, Clobazam, Clonazepam, Chlordiazepoxide, Lormetazepam, Oxazepam, Midazolam |
| Opioids                                           |                           |                                                                                                                                                              |
| Opioid prescription                               | Medication                | Codeine, Hydromorphone, Morphine, Opium, Oxycodone, Alfentanil, Dihydrocodeine,                                                                              |

|                                                |            |                                                                          |
|------------------------------------------------|------------|--------------------------------------------------------------------------|
|                                                |            | Diphenoxylate, Fentanyl, Remifentanyl, Pentazocine, Tramadol, Nalbuphine |
| Opioid use disorder                            | ICD-10     | F11                                                                      |
| Naloxone or naltrexone                         | Medication | Naloxone or naltrexone                                                   |
| Methadone                                      | Medication | Methadone                                                                |
| Buprenorphine                                  | Medication | Buprenorphine                                                            |
| <b>Composite outcomes</b>                      |            |                                                                          |
| Any psychiatric diagnosis                      | Composite  | Any ICD-10 code listed                                                   |
| Any prescriptions for psychotropic medications | Composite  | Any psychotic medication listed                                          |
| Any mental health related conditions           | Composite  | Any ICD-10 code or psychotic medication listed                           |



**Supplementary Table 2. Demographic and medical characteristics of SARS-CoV-2 infection, contemporary control, and historical control cohorts before weighting**

| Characteristics                                | SARS-Cov-2<br>infection<br>(n=26181) | Contemporary<br>control<br>(n=380398) | Historical<br>control<br>(n=384030) | ASMD between infection<br>and contemporary control* | ASMD between infection<br>and historical control* |
|------------------------------------------------|--------------------------------------|---------------------------------------|-------------------------------------|-----------------------------------------------------|---------------------------------------------------|
| Age, mean (sd)                                 | 66.0 (8.5)                           | 68.8 (8.1)                            | 67.87 (8.06)                        | 0.34                                                | 0.23                                              |
| Sex, male (%)                                  | 12340 (47.1)                         | 169377 (44.5)                         | 171447 (44.6)                       | 0.05                                                | 0.05                                              |
| Ethnicity, White (%)                           | 22151 (84.6)                         | 356546 (93.7)                         | 360042 (93.8)                       | 0.30                                                | 0.30                                              |
| Index of Multiple Deprivation, mean (sd)       | 20.5 (14.9)                          | 17.3 (13.7)                           | 17.3 (13.75)                        | 0.22                                                | 0.22                                              |
| Body Mass Index, mean (sd)                     | 28.1 (5.0)                           | 27.3 (4.7)                            | 27.3 (4.71)                         | 0.17                                                | 0.16                                              |
| Current smoker (%)                             | 2843 (10.9)                          | 36704 (9.6)                           | 37312 (9.7)                         | 0.01                                                | 0.23                                              |
| Current drinker (%)                            | 23771 (90.8)                         | 349770 (91.9)                         | 352987 (91.9)                       | 0.11                                                | 0.05                                              |
| Physical activity, high level (%) <sup>#</sup> | 8554 (32.7)                          | 124637 (32.8)                         | 125638 (32.7)                       | 0.05                                                | 0.06                                              |
| Vaccination status, fully-vaccinated (%)       | 9739 (37.2)                          | 149496 (39.3)                         | NA                                  | 0.04                                                | NA                                                |
| Medications (%) <sup>†</sup>                   |                                      |                                       |                                     |                                                     |                                                   |
| Lipid lowering drugs                           | 8704 (33.2)                          | 135512 (35.6)                         | 132446 (34.5)                       | 0.05                                                | 0.03                                              |
| RAS inhibitors                                 | 6096 (23.3)                          | 91022 (23.9)                          | 90264 (23.5)                        | 0.02                                                | 0.01                                              |
| Other anti-hypertensives                       | 2882 (11.0)                          | 41046 (10.8)                          | 41577 (10.8)                        | 0.01                                                | 0.01                                              |
| Anticoagulants                                 | 1120 (4.3)                           | 16278 (4.3)                           | 15207 (4.0)                         | 0.01                                                | 0.02                                              |
| Antiplatelet drugs                             | 3030 (11.6)                          | 42694 (11.2)                          | 42483 (11.1)                        | 0.01                                                | 0.02                                              |
| Proton pump inhibitors                         | 8491 (32.4)                          | 110972 (29.2)                         | 107396 (28.0)                       | 0.07                                                | 0.10                                              |
| Diabetes medicines                             | 2235 (8.5)                           | 25491 (6.7)                           | 25392 (6.6)                         | 0.07                                                | 0.07                                              |
| Systemic glucocorticoids                       | 1746 (6.7)                           | 19850 (5.2)                           | 24417 (6.4)                         | 0.06                                                | 0.01                                              |
| Immunosuppressants                             | 341 (1.3)                            | 4734 (1.2)                            | 4772 (1.2)                          | 0.01                                                | 0.01                                              |
| Antineoplastic agents                          | 36 (0.1)                             | 437 (0.1)                             | 407 (0.1)                           | 0.01                                                | 0.01                                              |
| Coexisting conditions (%) <sup>†</sup>         |                                      |                                       |                                     |                                                     |                                                   |
| Acquired immunodeficiency syndrome             | 27 (0.1)                             | 394 (0.1)                             | 384 (0.1)                           | 0.01                                                | 0.01                                              |
| Cancer                                         | 2419 (9.2)                           | 40851 (10.7)                          | 39391 (10.3)                        | 0.05                                                | 0.03                                              |
| Cerebrovascular disease                        | 625 (2.4)                            | 8811 (2.3)                            | 8289 (2.2)                          | 0.01                                                | 0.02                                              |
| Chronic obstructive pulmonary disease          | 4807 (18.4)                          | 62961 (16.6)                          | 62416 (16.3)                        | 0.05                                                | 0.06                                              |
| Chronic kidney disease                         | 1399 (5.3)                           | 20033 (5.3)                           | 18945 (4.9)                         | 0.01                                                | 0.02                                              |

|                                             |              |              |              |      |      |
|---------------------------------------------|--------------|--------------|--------------|------|------|
| Congestive heart failure                    | 506 (1.9)    | 5659 (1.5)   | 5066 (1.3)   | 0.03 | 0.05 |
| Dementia                                    | 485 (1.9)    | 3025 (0.8)   | 2551 (0.7)   | 0.09 | 0.11 |
| Diabetes (uncomplicated)                    | 2952 (11.3)  | 36070 (9.5)  | 34821 (9.1)  | 0.06 | 0.07 |
| Diabetes (end-organ damage)                 | 961 (3.7)    | 11413 (3.0)  | 10927 (2.8)  | 0.04 | 0.05 |
| Hemiplegia                                  | 36 (0.1)     | 415 (0.1)    | 417 (0.1)    | 0.01 | 0.01 |
| Liver disease                               | 220 (0.8)    | 2823 (0.7)   | 2750 (0.7)   | 0.01 | 0.01 |
| Peptic ulcer                                | 703 (2.7)    | 8900 (2.3)   | 8855 (2.3)   | 0.02 | 0.02 |
| Rheumatoid arthritis                        | 818 (3.1)    | 11262 (3.0)  | 10712 (2.8)  | 0.01 | 0.02 |
| Blood pressure, mean (sd), mm Hg            |              |              |              |      |      |
| Systolic blood pressure                     | 82.1 (10.6)  | 82.1 (10.5)  | 82.1 (10.5)  | 0.01 | 0.01 |
| Diastolic blood pressure                    | 137.4 (18.8) | 139.5 (19.3) | 139.5 (19.3) | 0.11 | 0.11 |
| Hospital admissions, mean (sd) <sup>†</sup> | 0.58 (2.79)  | 0.37 (1.85)  | 0.43 (2.02)  | 0.09 | 0.06 |

Abbreviations: SD, standard deviation; MET, metabolic equivalent of task; ASMD, absolute standardized mean difference.

# Physical activity status was measured by the International Physical Activity Questionnaire (IPAQ).

<sup>†</sup>Data collected within past one year of T<sub>0</sub> from primary care records.

\*ASMD ≤0.10 is considered good balance between comparison groups.

**Supplementary Table 3. Risks of first composite mental health outcomes in participants with breakthrough infection compared with non-breakthrough infection**

| Outcome                           | Hazard ratio<br>(95% CI) | Incidence rate per 1000 people at one year (95% CI) |                               | Difference in incidence rate per<br>1000 people at one year (95% CI) |
|-----------------------------------|--------------------------|-----------------------------------------------------|-------------------------------|----------------------------------------------------------------------|
|                                   |                          | Breakthrough infection                              | Non-breakthrough<br>infection |                                                                      |
| Any psychiatric diagnosis         | 0.26 (0.18-0.36)         | 40.95 (38.01-44.05)                                 | 51.60 (50.55-52.68)           | -                                                                    |
| Any psychotropic prescription     | 0.47 (0.33-0.66)         | 45.51 (42.23-48.98)                                 | 69.13 (67.83-70.44)           | -                                                                    |
| Any mental health related outcome | 0.41 (0.30-0.56)         | 64.49 (60.55-68.63)                                 | 90.35 (88.84-91.87)           | -                                                                    |

Mental health outcomes were ascertained after the SARS-CoV-2 infection until the end of follow-up. Hazard ratios were adjusted for predefined and data-driven covariates.

**Supplementary Table 4. Risks of first composite mental health outcomes in participants who tested positive in hospital setting compared with those who tested positive in community setting**

| Outcome                           | Hazard ratio<br>(95% CI) | Incidence rate per 1000 people at one year (95% CI) |                     | Difference in incidence rate per<br>1000 people at one year (95% CI) |
|-----------------------------------|--------------------------|-----------------------------------------------------|---------------------|----------------------------------------------------------------------|
|                                   |                          | Hospital setting                                    | Community setting   |                                                                      |
| Any psychiatric diagnosis         | 3.60 (2.98-4.45)         | 133.14 (128.65-137.74)                              | 38.41 (37.48-39.36) | -                                                                    |
| Any psychotropic prescription     | 2.22 (1.82-2.67)         | 124.97 (120.44-129.63)                              | 58.00 (56.78-59.24) | -                                                                    |
| Any mental health related outcome | 1.96 (1.64-2.34)         | 151.00 (145.80-156.34)                              | 78.90 (77.47-80.36) | -                                                                    |

Mental health outcomes were ascertained after the SARS-CoV-2 infection until the end of follow-up. Hazard ratios were adjusted for predefined and data-driven covariates.

**Supplementary Table 5. Risks of first composite mental health outcomes in SARS-CoV-2 infection group compared with the control groups of respiratory tract infection or the test-negative control groups**

| Control groups                  | Any first psychiatric diagnoses (95% CI) |                           | Any psychotropic prescriptions (95%) |                          | Any mental health related outcomes (95% CI) |                           |
|---------------------------------|------------------------------------------|---------------------------|--------------------------------------|--------------------------|---------------------------------------------|---------------------------|
|                                 | HR                                       | ARD                       | HR                                   | ARD                      | HR                                          | ARD                       |
| Any respiratory tract infection | 0.79 (0.67-0.93)                         | -13.13 (-20.60 to -4.33)  | 0.79 (0.68-0.92)                     | -17.70 (-27.39 to -6.35) | 0.74 (0.64-0.84)                            | -31.61 (-42.91 to -18.64) |
| Test-negative                   | 0.67 (0.61-0.73)                         | -24.48 (-28.69 to -19.87) | 0.94 (0.86-1.02)                     | -4.64 (-10.24 to 1.47)   | 0.75 (0.70-0.81)                            | -29.01 (-35.47 to -22.03) |

**Supplementary Table 6. Sensitivity analyses for the risks of first composite mental health outcomes in infection group compared with contemporary control groups**

| Analysis                                                          | Any first psychiatric diagnoses (95% CI) |                        | Any psychotropic prescriptions (95%) |                        | Any mental health related outcomes (95% CI) |                        |
|-------------------------------------------------------------------|------------------------------------------|------------------------|--------------------------------------|------------------------|---------------------------------------------|------------------------|
|                                                                   | HR                                       | ARD                    | HR                                   | ARD                    | HR                                          | ARD                    |
| Using PS matching                                                 | 1.87 (1.72-2.04)                         | -                      | 1.49 (1.37-1.62)                     | -                      | 1.48 (1.37-1.59)                            | -                      |
| Using data-driven covariates within three years                   | 2.02 (1.85-2.21)                         | 24.87 (20.71 to 29.40) | 1.61 (1.48-1.75)                     | 25.41 (20.00 to 31.29) | 1.58 (1.47-1.70)                            | 32.18 (25.89 to 38.96) |
| Excluding participants with history in two years before follow-up | 2.04 (1.86-2.26)                         | 21.54 (17.63 to 25.86) | 1.69 (1.55 to 1.85)                  | 25.13 (19.81 to 30.96) | 1.66 (1.53 to 1.80)                         | 31.02 (24.84 to 37.72) |
